# Supplementary material
Source: PubMed Central journal article supplement (PMC9806550)
Supplement: kiac502_supplementary_data.pdf [file kiac502_supplementary_data.pdf]

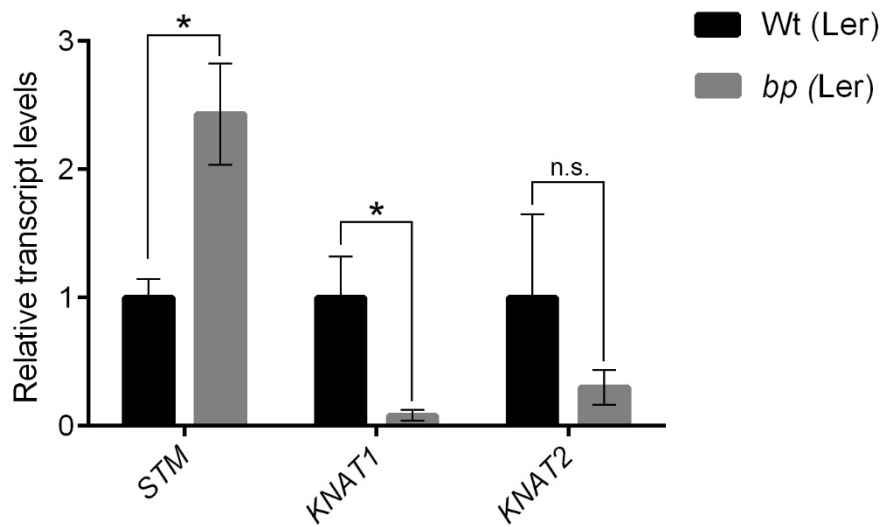

**Supplemental Figure S1.** Expression levels of class I *KNOX* genes in stamens from *bp-1* flowers. Relative *STM*, *KNAT1* and *KNAT2* transcript levels in stamens from stage 13 wild-type and *bp-1* flowers were determined by RT-qPCR. The bars indicate the mean $\pm$ SE of three biological replicates. Asterisks indicate significant differences with wild-type ( $P < 0.05$ ; Student's *t*-test).

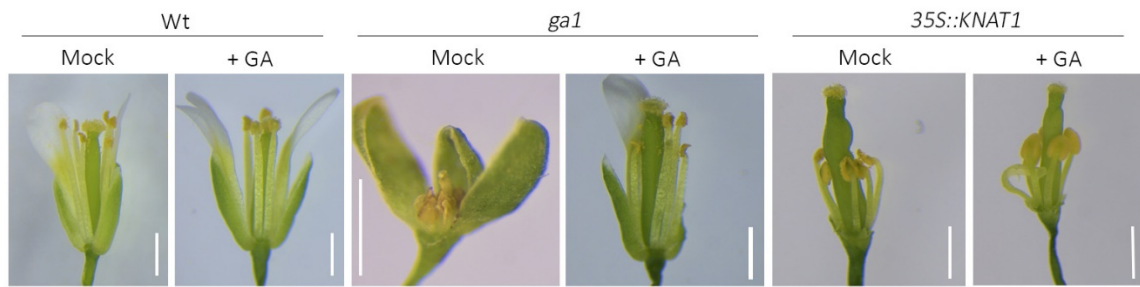

**Supplemental Figure S2.** Flowers of wild-type, *35S::KNAT1* and *gal* plants after treatment with either gibberellin (GA<sub>3</sub>) or mock solution. Outer organs were removed for visualization of the stamens. Bars: 1 mm.

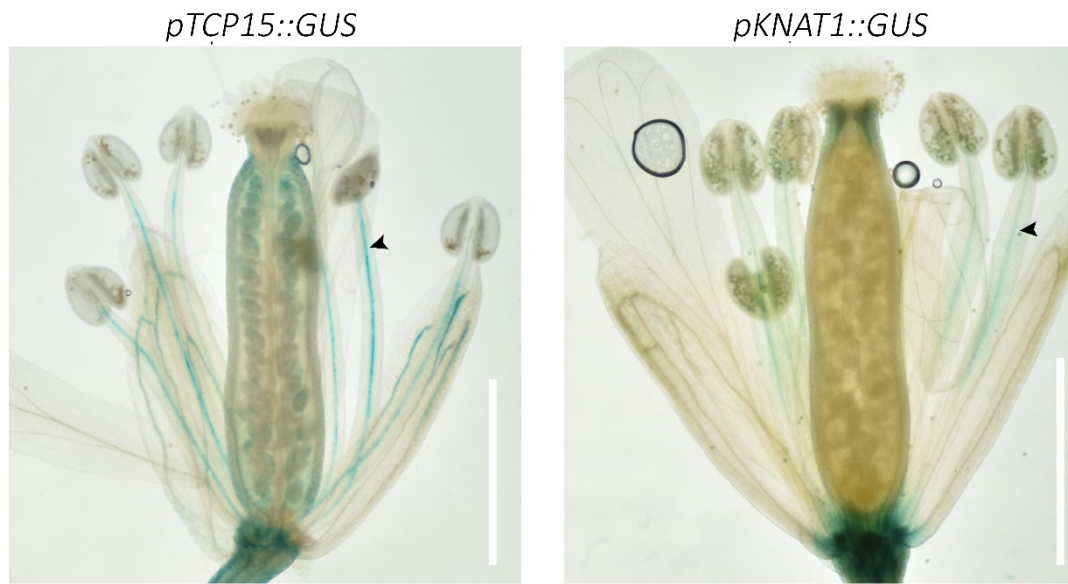

**Supplemental Figure S3.** Histochemical analysis of *KNAT1* and *TCP15* expression in stamen filaments. GUS histochemical staining was performed on flowers from plants carrying *pTCP15::GUS* or *pKNAT1::GUS* constructs. Arrowheads indicate the vascular system of stamen filaments. Bars: 1 mm.

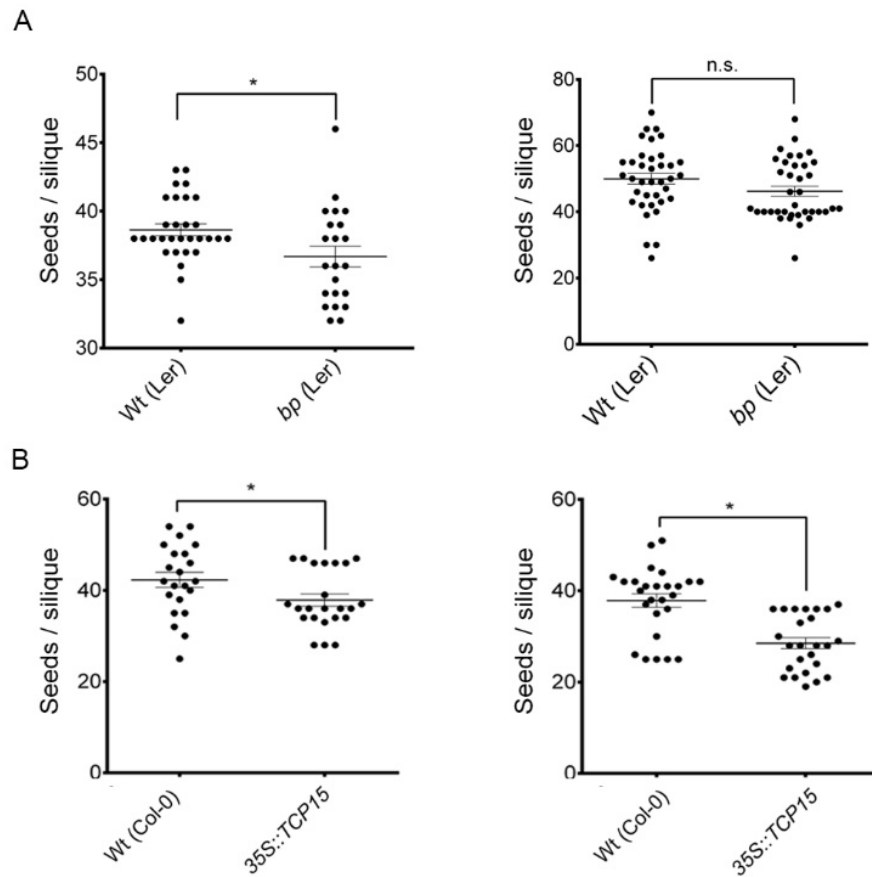

**Supplemental Figure S4.** Seed production in siliques from *bp-1* and *35S::TCP15* plants. The number of seeds per silique was analyzed in *bp-1* (A), *35S::TCP15* plants (B), and the corresponding wild-type lines. The results of two independent experiments (mean $\pm$ SE; n = 22–37 siliques) with plants grown at different times are shown. For *35S::TCP15* plants, the experiments were performed with two different lines. Asterisks indicate significant differences with wild-type ( $P < 0.05$ ; Student's *t*-test).

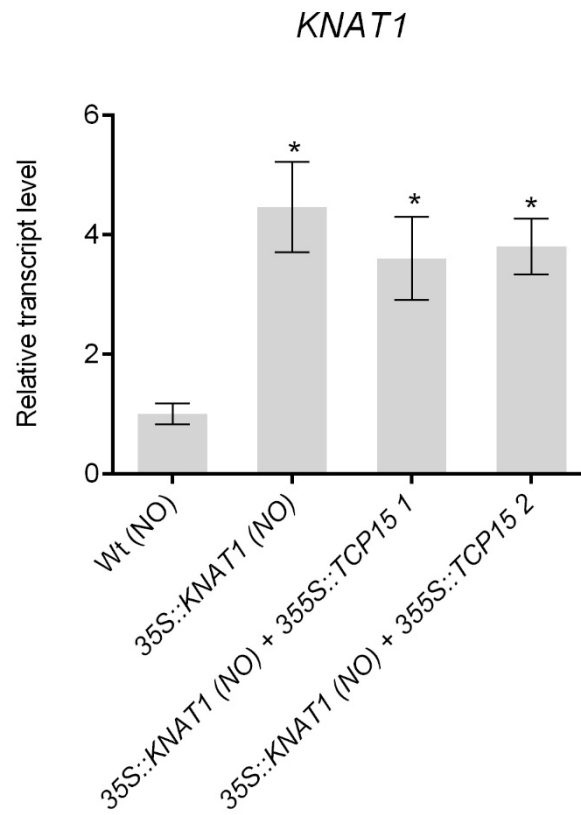

**Supplemental Figure S5.** *KNAT1* expression levels in wild-type, *35S::KNAT1* and *35S::KNAT1 35S::TCP15* plants. The bars indicate the mean±SE of three biological replicates. Asterisks indicate significant differences with wild-type plants ( $P < 0.05$ ; Student's *t*-test).
